# Supplementary material
Source: HighWire-hosted journal article supplement (https://www.jneurosci.org/highwire/filestream/599627/field_highwire_adjunct_files/7/Table_S1.pdf)
Supplement: Table_S1.pdf [file Table_S1.pdf]

| Chimeric Constructs | Regions from hTRPA1            |                              | Regions from mTRPA1           |                             | Regions from dTRPA1 |                |
|---------------------|--------------------------------|------------------------------|-------------------------------|-----------------------------|---------------------|----------------|
|                     | Regions                        | Amino Acids                  | Regions                       | Amino Acids                 | Regions             | Amino Acids    |
| hTRPA1-mN           | TM1-6 / C-terminus             | Ile735-Pro1119               | N-terminus                    | Met1-Thr736                 |                     |                |
| hTRPA1-mC           | N-terminus / TM1-6             | Met1-Gly962                  | C-terminus                    | Asp966-Phe1125              |                     |                |
| hTRPA1-mTM1-6       | N-terminus / C-terminus        | Met1-Thr734/ Val948-Pro1119  | TM1-6                         | Leu737-Phe950               |                     |                |
| hTRPA1-mTM1-4       | N-terminus / TM5-6/ C-terminus | Met1-Thr734/ Ile866-Pro1119  | TM1-4                         | Leu737-Val868               |                     |                |
| hTRPA1-mTM5-6       | N-terminus/ TM1-4/ C-terminus  | Met1-Asn855/ Val948-Pro1119  | TM5-6                         | Cys859-Phe950               |                     |                |
| mTRPA1-hTM1-6       | TM1-6                          | Ile735-Phe947                | N-terminus/ C-terminus        | Met1-Thr736/ Val951-Phe1125 |                     |                |
| mTRPA1-hTM56        | TM5-6                          | Cys856-Phe947                | N-terminus/ TM1-4/ C-terminus | Met1-Asn858/ Val951-Phe1125 |                     |                |
| mTRPA1-dTM5         |                                |                              | Regions excluding TM5         | Met1-Ile869/ Phe897-Phe1125 | TM5                 | Leu983-Ser1009 |
| hTRPA1-dTM5         | Regions excluding TM5          | Met1-Ile8660/ Leu894-Pro1119 |                               |                             | TM5                 | Leu983-Ser1009 |
| hTRPA1-dTM5a        | Regions excluding TM5a         | Met1-Ile866/ Ala883-Pro1119  |                               |                             | TM5a                | Leu983-Ile998  |
| dTRPA1-mN           |                                |                              | N-terminus                    | Met1-Ala720                 | TM1-6 / C-term      | Phe752-Met1197 |
